# Supplementary material for: Pharmacological Treatments of Temporomandibular Disorders: A Systematic Review Including a Network Meta-Analysis
Source: Springer Nature journal article supplement (doi:10.1007/s40265-023-01971-9), 2023-12-16
Supplement: MOESM2 [file 26536084]

**Supplementary information 2:** Search strategies for each database: *1) Medline; 2) Embase; 3) Cochrane; 4) Web of Science Core Collection; and 5) Cinahl*

**Article title:** Pharmacological treatments of temporomandibular disorders – a systematic review including a network meta-analysis

**Journal name:** Drugs

**Authors:** Nikolaos Christidis\*, Essam Ahmed Al-Moraissi, Golnaz Barjandi, Johanna Svedenlöf, Hajer Jasim, Maria Christidis, Malin Collin

**\*Corresponding author affiliation:** Nikolaos Christidis, Karolinska Institutet, Department of Dental Medicine, Box 4064, SE-141 04 Huddinge, Sweden; [nikolaos.christidis@ki.se](mailto:nikolaos.christidis@ki.se)

# 1. Medline

|                                                                                                                                                                                                                                                                                                                      |                                                                                                                                                                                                                                                    |                                                                                                                                                                                                                                                                                                                   |
|----------------------------------------------------------------------------------------------------------------------------------------------------------------------------------------------------------------------------------------------------------------------------------------------------------------------|----------------------------------------------------------------------------------------------------------------------------------------------------------------------------------------------------------------------------------------------------|-------------------------------------------------------------------------------------------------------------------------------------------------------------------------------------------------------------------------------------------------------------------------------------------------------------------|
| <p>Interface: Ovid MEDLINE(R) and Epub Ahead of Print, In-Process &amp; Other Non-Indexed Citations and Daily</p> <p>Date of Search: <b>6 April 2023</b></p> <p>Number of hits: <b>1366</b></p> <p>Comment: In Ovid, two or more words are automatically searched as phrases; i.e. no quotation marks are needed</p> |                                                                                                                                                                                                                                                    | <p>Field labels</p> <ul style="list-style-type: none"> <li>• exp/ = exploded MeSH term</li> <li>• / = non exploded MeSH term</li> <li>• .ti,ab,kf. = title, abstract and author keywords</li> <li>• adjx = within x words, regardless of order</li> <li>• * = truncation of word for alternate endings</li> </ul> |
| <p>Ovid MEDLINE(R) ALL &lt;1946 to April 05, 2023&gt;</p>                                                                                                                                                                                                                                                            |                                                                                                                                                                                                                                                    |                                                                                                                                                                                                                                                                                                                   |
| 1                                                                                                                                                                                                                                                                                                                    | exp Craniomandibular Disorders/                                                                                                                                                                                                                    | 19013                                                                                                                                                                                                                                                                                                             |
| 2                                                                                                                                                                                                                                                                                                                    | exp Myofascial Pain Syndromes/                                                                                                                                                                                                                     | 6821                                                                                                                                                                                                                                                                                                              |
| 3                                                                                                                                                                                                                                                                                                                    | (Craniomandibular adj3 (arthropath* or disease* or disorder* or dysfuncti* or pain* or syndrom*)).ti,ab,kf.                                                                                                                                        | 693                                                                                                                                                                                                                                                                                                               |
| 4                                                                                                                                                                                                                                                                                                                    | ((jaw or temporomandibular or tmj) adj3 (arthropath* or disease* or dislocation* or disorder* or dysfuncti* or luxation* or pain* or subluxation* or syndrom*)).ti,ab,kf.                                                                          | 14254                                                                                                                                                                                                                                                                                                             |
| 5                                                                                                                                                                                                                                                                                                                    | ((myofascial or orofacial) adj2 (pain* or syndrom* or trigger point*)).ti,ab,kf.                                                                                                                                                                   | 6371                                                                                                                                                                                                                                                                                                              |
| 6                                                                                                                                                                                                                                                                                                                    | (costen* syndrom* or tmd*).ti,ab,kf.                                                                                                                                                                                                               | 11839                                                                                                                                                                                                                                                                                                             |
| 7                                                                                                                                                                                                                                                                                                                    | or/1-6                                                                                                                                                                                                                                             | 35750                                                                                                                                                                                                                                                                                                             |
| 8                                                                                                                                                                                                                                                                                                                    | exp Anti-Inflammatory Agents/                                                                                                                                                                                                                      | 565696                                                                                                                                                                                                                                                                                                            |
| 9                                                                                                                                                                                                                                                                                                                    | exp Antidepressive Agents/                                                                                                                                                                                                                         | 159711                                                                                                                                                                                                                                                                                                            |
| 10                                                                                                                                                                                                                                                                                                                   | Anticonvulsants/                                                                                                                                                                                                                                   | 55680                                                                                                                                                                                                                                                                                                             |
| 11                                                                                                                                                                                                                                                                                                                   | exp Serotonin Agents/                                                                                                                                                                                                                              | 170668                                                                                                                                                                                                                                                                                                            |
| 12                                                                                                                                                                                                                                                                                                                   | exp Botulinum Toxins/                                                                                                                                                                                                                              | 18419                                                                                                                                                                                                                                                                                                             |
| 13                                                                                                                                                                                                                                                                                                                   | Acetaminophen/                                                                                                                                                                                                                                     | 20506                                                                                                                                                                                                                                                                                                             |
| 14                                                                                                                                                                                                                                                                                                                   | Neurotransmitter Uptake Inhibitors/                                                                                                                                                                                                                | 1205                                                                                                                                                                                                                                                                                                              |
| 15                                                                                                                                                                                                                                                                                                                   | Gabapentin/                                                                                                                                                                                                                                        | 4334                                                                                                                                                                                                                                                                                                              |
| 16                                                                                                                                                                                                                                                                                                                   | Carbamazepine/                                                                                                                                                                                                                                     | 11846                                                                                                                                                                                                                                                                                                             |
| 17                                                                                                                                                                                                                                                                                                                   | Pregabalin/                                                                                                                                                                                                                                        | 2433                                                                                                                                                                                                                                                                                                              |
| 18                                                                                                                                                                                                                                                                                                                   | Anesthetics, local/                                                                                                                                                                                                                                | 37673                                                                                                                                                                                                                                                                                                             |
| 19                                                                                                                                                                                                                                                                                                                   | Granisetron/                                                                                                                                                                                                                                       | 1141                                                                                                                                                                                                                                                                                                              |
| 20                                                                                                                                                                                                                                                                                                                   | exp Analgesics/                                                                                                                                                                                                                                    | 585070                                                                                                                                                                                                                                                                                                            |
| 21                                                                                                                                                                                                                                                                                                                   | Glucocorticoids/                                                                                                                                                                                                                                   | 70465                                                                                                                                                                                                                                                                                                             |
| 22                                                                                                                                                                                                                                                                                                                   | (Glucocort* or glycocort*).ti,ab,kf,nm.                                                                                                                                                                                                            | 127637                                                                                                                                                                                                                                                                                                            |
| 23                                                                                                                                                                                                                                                                                                                   | (antiinflammatory or anti inflammatory or NSAID? or Aspirin Like Agent?).ti,ab,kf,nm.                                                                                                                                                              | 321110                                                                                                                                                                                                                                                                                                            |
| 24                                                                                                                                                                                                                                                                                                                   | (Anodynes or Analgesic* or Antinociceptive or opioid* or opioid*).ti,ab,kf,nm.                                                                                                                                                                     | 244009                                                                                                                                                                                                                                                                                                            |
| 25                                                                                                                                                                                                                                                                                                                   | (Granisetron or Hydrochloride or Kyrtil or sustol or taraz or viatrinil or pandiol or rasetron or sancuso or granisol or granissetrom or granitron or kevatril or emegar or eutrom or granegis or grani-denk or granicip or granigen).ti,ab,kf,nm. | 76183                                                                                                                                                                                                                                                                                                             |
| 26                                                                                                                                                                                                                                                                                                                   | (Local Anesthetic* or Conduction-Blocking Anesthetic* or Topical Anesthetic*).ti,ab,kf,nm.                                                                                                                                                         | 21159                                                                                                                                                                                                                                                                                                             |
| 27                                                                                                                                                                                                                                                                                                                   | (Pregabalin or Lyrica or vronogabic).ti,ab,kf,nm.                                                                                                                                                                                                  | 4568                                                                                                                                                                                                                                                                                                              |

|    |                                                                                                                                                                                                                                                                                                                                                                                                                                                                                                                                                                                                                                                                                                                                                                                                                                                                                |         |
|----|--------------------------------------------------------------------------------------------------------------------------------------------------------------------------------------------------------------------------------------------------------------------------------------------------------------------------------------------------------------------------------------------------------------------------------------------------------------------------------------------------------------------------------------------------------------------------------------------------------------------------------------------------------------------------------------------------------------------------------------------------------------------------------------------------------------------------------------------------------------------------------|---------|
| 28 | (apo-carbamazepine or Amizepin* or atretol or Carbamazepine or Carbazepin or Bipotrol or biston or calepsin or camapine or carbadac or carbadura or carbagen or carbalex or carbategral or carbatol or carbatrol or carbazene or carbazep or carbazina or carbella or carbepsil or carmaz or carnexiv or carpaz or carzepin or carzepine or clostedal or convuline or curtail or epileptol or epimax or epitol or eposal retard or equetro or espa-lepsin or finlepsin or foxalepsin or hermolepsin or karbamazepin or karbelex or kodapan or lexin or mazepine or mazetol or neugeron or neurotol or neurotop or nordotol or painbrake or panitol or servimazepin or sirtal or stazepine or storilat or syntopine or tardotol or taver or tegol or tegral or tegretal or tegretol or Trileptal or Timox or temporol or teril or timonil or tegrital or telesmin).ti,ab,kf,nm. | 23373   |
| 29 | (Convalis or dineurin or gabalept or gabaliquid or geriasan or Gabapen* or gabatin or gantin or gralise or kaptin or keneil or Neurontin or neurotonin or nupentin or sefelsa or serada).ti,ab,kf,nm.                                                                                                                                                                                                                                                                                                                                                                                                                                                                                                                                                                                                                                                                          | 8591    |
| 30 | (SSRI* or Serotonin*).ti,ab,kf,nm.                                                                                                                                                                                                                                                                                                                                                                                                                                                                                                                                                                                                                                                                                                                                                                                                                                             | 157846  |
| 31 | (NRI* or Norepinephrine or SNRI*).ti,ab,kf,nm.                                                                                                                                                                                                                                                                                                                                                                                                                                                                                                                                                                                                                                                                                                                                                                                                                                 | 117242  |
| 32 | (Acetaminophen or alvedon or Hydroxyacetanilide or APAP or p-Acetamidophenol or p-Hydroxyacetanilide or Paracetamol or Acetamidophenol or Acephen or Acetaco or Tylenol or Anacin? or Datriil or Panadol or Acamol or Algotropyl).ti,ab,kf,nm.                                                                                                                                                                                                                                                                                                                                                                                                                                                                                                                                                                                                                                 | 33819   |
| 33 | (Botulinum Neurotoxin* or Botul* Toxin* or Botulin).ti,ab,kf,nm.                                                                                                                                                                                                                                                                                                                                                                                                                                                                                                                                                                                                                                                                                                                                                                                                               | 24331   |
| 34 | (azzalure or Bocouture or boe-tox or Meditoxin or Botox or cunox or daxibotulinum or daxxify or dyslor or Dysport or evabotulinum or evosyal or gemibotulinum or hutox or Incobotulinum or jeuveau or letibotulinum or Neuronox or nabota or nivobotulinum or nuceiva or Oculinum or Onabotulinum* or onaclostox or prabotulinum* or prosigne or Purtox or relaxin or relabotulinum* or Vistabel or Vistabex or xeom*).ti,ab,kf,nm.                                                                                                                                                                                                                                                                                                                                                                                                                                            | 4338    |
| 35 | (Anticonvuls* or Antiepileptic* or anti-convuls* or anti-epileptic*).ti,ab,kf,nm.                                                                                                                                                                                                                                                                                                                                                                                                                                                                                                                                                                                                                                                                                                                                                                                              | 81083   |
| 36 | (Antidepress* or anti-depress* or neurothymoleptic* or Thymoanaleptic* or Thymoleptic* or psychoenergizer).ti,ab,kf,nm.                                                                                                                                                                                                                                                                                                                                                                                                                                                                                                                                                                                                                                                                                                                                                        | 101524  |
| 37 | (Neurotransmitter uptake inhibitor* or Adrenergic or GABA).ti,ab,kf,nm.                                                                                                                                                                                                                                                                                                                                                                                                                                                                                                                                                                                                                                                                                                                                                                                                        | 238279  |
| 38 | (cyclooxygenase or Cyclo Oxygenase or prostaglandin*).ti,ab,kf,nm.                                                                                                                                                                                                                                                                                                                                                                                                                                                                                                                                                                                                                                                                                                                                                                                                             | 167110  |
| 39 | or/8-38                                                                                                                                                                                                                                                                                                                                                                                                                                                                                                                                                                                                                                                                                                                                                                                                                                                                        | 2040012 |
| 40 | 7 and 39                                                                                                                                                                                                                                                                                                                                                                                                                                                                                                                                                                                                                                                                                                                                                                                                                                                                       | 2780    |
| 41 | randomized controlled trial.pt.                                                                                                                                                                                                                                                                                                                                                                                                                                                                                                                                                                                                                                                                                                                                                                                                                                                | 590179  |
| 42 | controlled clinical trial.pt.                                                                                                                                                                                                                                                                                                                                                                                                                                                                                                                                                                                                                                                                                                                                                                                                                                                  | 95253   |
| 43 | randomized.ab.                                                                                                                                                                                                                                                                                                                                                                                                                                                                                                                                                                                                                                                                                                                                                                                                                                                                 | 598601  |
| 44 | placebo.ab.                                                                                                                                                                                                                                                                                                                                                                                                                                                                                                                                                                                                                                                                                                                                                                                                                                                                    | 237137  |
| 45 | drug therapy.fs.                                                                                                                                                                                                                                                                                                                                                                                                                                                                                                                                                                                                                                                                                                                                                                                                                                                               | 2579479 |
| 46 | randomly.ab.                                                                                                                                                                                                                                                                                                                                                                                                                                                                                                                                                                                                                                                                                                                                                                                                                                                                   | 405545  |
| 47 | trial.ab.                                                                                                                                                                                                                                                                                                                                                                                                                                                                                                                                                                                                                                                                                                                                                                                                                                                                      | 642616  |
| 48 | groups.ab.                                                                                                                                                                                                                                                                                                                                                                                                                                                                                                                                                                                                                                                                                                                                                                                                                                                                     | 2499164 |
| 49 | or/41-48                                                                                                                                                                                                                                                                                                                                                                                                                                                                                                                                                                                                                                                                                                                                                                                                                                                                       | 5623778 |
| 50 | exp animals/ not humans.sh.                                                                                                                                                                                                                                                                                                                                                                                                                                                                                                                                                                                                                                                                                                                                                                                                                                                    | 5109126 |
| 51 | 49 not 50                                                                                                                                                                                                                                                                                                                                                                                                                                                                                                                                                                                                                                                                                                                                                                                                                                                                      | 4905493 |
| 52 | 40 and 51                                                                                                                                                                                                                                                                                                                                                                                                                                                                                                                                                                                                                                                                                                                                                                                                                                                                      | 1366    |

## 2. Embase

| Interface: embase.com                                  |                                                                                                                                                                                                                                                                                                                                                                                                                                                                                                                                                                                                                                                                                                                                                                                                                                                                                                                                                                                                                                                                                                                                                                                                                                                                                                                                                                                                                                                                                                                                                                                                                                                                                                                                                                                                                                                                                                                                                                                                                                                                                                                                                                                                                                                                                                                                                                                                                                                                                                                                                                    | Field labels |
|--------------------------------------------------------|--------------------------------------------------------------------------------------------------------------------------------------------------------------------------------------------------------------------------------------------------------------------------------------------------------------------------------------------------------------------------------------------------------------------------------------------------------------------------------------------------------------------------------------------------------------------------------------------------------------------------------------------------------------------------------------------------------------------------------------------------------------------------------------------------------------------------------------------------------------------------------------------------------------------------------------------------------------------------------------------------------------------------------------------------------------------------------------------------------------------------------------------------------------------------------------------------------------------------------------------------------------------------------------------------------------------------------------------------------------------------------------------------------------------------------------------------------------------------------------------------------------------------------------------------------------------------------------------------------------------------------------------------------------------------------------------------------------------------------------------------------------------------------------------------------------------------------------------------------------------------------------------------------------------------------------------------------------------------------------------------------------------------------------------------------------------------------------------------------------------------------------------------------------------------------------------------------------------------------------------------------------------------------------------------------------------------------------------------------------------------------------------------------------------------------------------------------------------------------------------------------------------------------------------------------------------|--------------|
| Date of Search: <b>6 April 2023</b>                    |                                                                                                                                                                                                                                                                                                                                                                                                                                                                                                                                                                                                                                                                                                                                                                                                                                                                                                                                                                                                                                                                                                                                                                                                                                                                                                                                                                                                                                                                                                                                                                                                                                                                                                                                                                                                                                                                                                                                                                                                                                                                                                                                                                                                                                                                                                                                                                                                                                                                                                                                                                    |              |
| Number of hits: <b>1090</b>                            |                                                                                                                                                                                                                                                                                                                                                                                                                                                                                                                                                                                                                                                                                                                                                                                                                                                                                                                                                                                                                                                                                                                                                                                                                                                                                                                                                                                                                                                                                                                                                                                                                                                                                                                                                                                                                                                                                                                                                                                                                                                                                                                                                                                                                                                                                                                                                                                                                                                                                                                                                                    |              |
| Comment: Emtree is the controlled vocabulary in Embase |                                                                                                                                                                                                                                                                                                                                                                                                                                                                                                                                                                                                                                                                                                                                                                                                                                                                                                                                                                                                                                                                                                                                                                                                                                                                                                                                                                                                                                                                                                                                                                                                                                                                                                                                                                                                                                                                                                                                                                                                                                                                                                                                                                                                                                                                                                                                                                                                                                                                                                                                                                    |              |
|                                                        | <ul style="list-style-type: none"> <li>• /exp = exploded Emtree term</li> <li>• /de = non exploded Emtree term</li> <li>• ti,ab,kw = title, abstract and author keywords</li> <li>• NEAR/x = within x words, regardless of order</li> <li>• * = truncation of word for alternate endings</li> </ul>                                                                                                                                                                                                                                                                                                                                                                                                                                                                                                                                                                                                                                                                                                                                                                                                                                                                                                                                                                                                                                                                                                                                                                                                                                                                                                                                                                                                                                                                                                                                                                                                                                                                                                                                                                                                                                                                                                                                                                                                                                                                                                                                                                                                                                                                |              |
| No.                                                    | Query                                                                                                                                                                                                                                                                                                                                                                                                                                                                                                                                                                                                                                                                                                                                                                                                                                                                                                                                                                                                                                                                                                                                                                                                                                                                                                                                                                                                                                                                                                                                                                                                                                                                                                                                                                                                                                                                                                                                                                                                                                                                                                                                                                                                                                                                                                                                                                                                                                                                                                                                                              | Results      |
| #44                                                    | #42 NOT #43                                                                                                                                                                                                                                                                                                                                                                                                                                                                                                                                                                                                                                                                                                                                                                                                                                                                                                                                                                                                                                                                                                                                                                                                                                                                                                                                                                                                                                                                                                                                                                                                                                                                                                                                                                                                                                                                                                                                                                                                                                                                                                                                                                                                                                                                                                                                                                                                                                                                                                                                                        | 1090         |
| #43                                                    | #40 AND #41 AND ([conference abstract]/lim OR [conference paper]/lim OR [conference review]/lim)                                                                                                                                                                                                                                                                                                                                                                                                                                                                                                                                                                                                                                                                                                                                                                                                                                                                                                                                                                                                                                                                                                                                                                                                                                                                                                                                                                                                                                                                                                                                                                                                                                                                                                                                                                                                                                                                                                                                                                                                                                                                                                                                                                                                                                                                                                                                                                                                                                                                   | 263          |
| #42                                                    | #40 AND #41                                                                                                                                                                                                                                                                                                                                                                                                                                                                                                                                                                                                                                                                                                                                                                                                                                                                                                                                                                                                                                                                                                                                                                                                                                                                                                                                                                                                                                                                                                                                                                                                                                                                                                                                                                                                                                                                                                                                                                                                                                                                                                                                                                                                                                                                                                                                                                                                                                                                                                                                                        | 1342         |
| #41                                                    | ('randomized controlled trial'/de OR 'controlled clinical trial'/de OR random*:ti,ab,tt OR 'randomization'/de OR 'intermethod comparison'/de OR placebo:ti,ab,tt OR compare:ti,tt OR compared:ti,tt OR comparison:ti,tt OR ((evaluated:ab OR evaluate:ab OR evaluating:ab OR assessed:ab OR assess:ab) AND (compare:ab OR compared:ab OR comparing:ab OR comparison:ab)) OR ((open NEXT/1 label):ti,ab,tt) OR (((double OR single OR doubly OR singly) NEXT/1 (blind OR blinded OR blindly)):ti,ab,tt) OR 'double blind procedure'/de OR ((parallel NEXT/1 group*):ti,ab,tt) OR crossover:ti,ab,tt OR 'cross over':ti,ab,tt OR (((assign* OR match OR matched OR allocation) NEAR/6 (alternate OR group OR groups OR intervention OR interventions OR patient OR patients OR subject OR subjects OR participant OR participants)):ti,ab,tt) OR assigned:ti,ab,tt OR allocated:ti,ab,tt OR ((controlled NEAR/8 (study OR design OR trial)):ti,ab,tt) OR volunteer:ti,ab,tt OR volunteers:ti,ab,tt OR 'human experiment'/de OR trial:ti,tt) NOT (((random* NEXT/1 sampl* NEAR/8 ('cross section*' OR questionnaire* OR survey OR surveys OR database OR databases)):ti,ab,tt) NOT ('comparative study'/de OR 'controlled study'/de OR 'randomised controlled':ti,ab,tt OR 'randomized controlled':ti,ab,tt OR 'randomly assigned':ti,ab,tt) OR ('cross-sectional study' NOT ('randomized controlled trial'/de OR 'controlled clinical study'/de OR 'controlled study'/de OR 'randomised controlled':ti,ab,tt OR 'randomized controlled':ti,ab,tt OR 'control group':ti,ab,tt OR 'control groups':ti,ab,tt)) OR ('case control*':ti,ab,tt AND random*:ti,ab,tt NOT ('randomised controlled':ti,ab,tt OR 'randomized controlled':ti,ab,tt)) OR ('systematic review':ti,tt NOT (trial:ti,tt OR study:ti,tt)) OR (nonrandom*:ti,ab,tt NOT random*:ti,ab,tt) OR 'random field*':ti,ab,tt OR (('random cluster' NEAR/4 sampl*):ti,ab,tt) OR (review:ab AND review:it NOT trial:ti,tt) OR ('we searched':ab AND (review:ti,tt OR review:it)) OR 'update review':ab OR ((databases NEAR/5 searched):ab) OR ((rat:ti,tt OR rats:ti,tt OR mouse:ti,tt OR mice:ti,tt OR swine:ti,tt OR porcine:ti,tt OR murine:ti,tt OR sheep:ti,tt OR lambs:ti,tt OR pigs:ti,tt OR piglets:ti,tt OR rabbit:ti,tt OR rabbits:ti,tt OR cat:ti,tt OR cats:ti,tt OR dog:ti,tt OR dogs:ti,tt OR cattle:ti,tt OR bovine:ti,tt OR monkey:ti,tt OR monkeys:ti,tt OR trout:ti,tt OR marmoset*:ti,tt) AND 'animal experiment'/de) OR ('animal experiment'/de NOT ('human experiment'/de OR 'human'/de))) | 5457099      |
| #40                                                    | #7 AND #39                                                                                                                                                                                                                                                                                                                                                                                                                                                                                                                                                                                                                                                                                                                                                                                                                                                                                                                                                                                                                                                                                                                                                                                                                                                                                                                                                                                                                                                                                                                                                                                                                                                                                                                                                                                                                                                                                                                                                                                                                                                                                                                                                                                                                                                                                                                                                                                                                                                                                                                                                         | 6561         |
| #39                                                    | #8 OR #9 OR #10 OR #11 OR #12 OR #13 OR #14 OR #15 OR #16 OR #17 OR #18 OR #19 OR #20 OR #21 OR #22 OR #23 OR #24 OR #25 OR #26 OR #27 OR #28 OR #29 OR #30 OR #31 OR #32 OR #33 OR #34 OR #35 OR #36 OR #37 OR #38                                                                                                                                                                                                                                                                                                                                                                                                                                                                                                                                                                                                                                                                                                                                                                                                                                                                                                                                                                                                                                                                                                                                                                                                                                                                                                                                                                                                                                                                                                                                                                                                                                                                                                                                                                                                                                                                                                                                                                                                                                                                                                                                                                                                                                                                                                                                                | 4579593      |
| #38                                                    | cyclooxygenase:ti,ab,kw,tn OR 'cyclo oxygenase':ti,ab,kw,tn OR prostaglandin*:ti,ab,kw,tn                                                                                                                                                                                                                                                                                                                                                                                                                                                                                                                                                                                                                                                                                                                                                                                                                                                                                                                                                                                                                                                                                                                                                                                                                                                                                                                                                                                                                                                                                                                                                                                                                                                                                                                                                                                                                                                                                                                                                                                                                                                                                                                                                                                                                                                                                                                                                                                                                                                                          | 164713       |
| #37                                                    | 'neurotransmitter uptake inhibitor*':ti,ab,kw,tn OR adrenergic:ti,ab,kw,tn OR gaba:ti,ab,kw,tn                                                                                                                                                                                                                                                                                                                                                                                                                                                                                                                                                                                                                                                                                                                                                                                                                                                                                                                                                                                                                                                                                                                                                                                                                                                                                                                                                                                                                                                                                                                                                                                                                                                                                                                                                                                                                                                                                                                                                                                                                                                                                                                                                                                                                                                                                                                                                                                                                                                                     | 183376       |

|     |                                                                                                                                                                                                                                                                                                                                                                                                                                                                                                                                                                                                                                                                                                                                                                                                                                                                                                                                                                                                                                                                                                                                                                                                                                                                                                                                                                                                                                                                                                                                                                                                                                                                                                                        |        |
|-----|------------------------------------------------------------------------------------------------------------------------------------------------------------------------------------------------------------------------------------------------------------------------------------------------------------------------------------------------------------------------------------------------------------------------------------------------------------------------------------------------------------------------------------------------------------------------------------------------------------------------------------------------------------------------------------------------------------------------------------------------------------------------------------------------------------------------------------------------------------------------------------------------------------------------------------------------------------------------------------------------------------------------------------------------------------------------------------------------------------------------------------------------------------------------------------------------------------------------------------------------------------------------------------------------------------------------------------------------------------------------------------------------------------------------------------------------------------------------------------------------------------------------------------------------------------------------------------------------------------------------------------------------------------------------------------------------------------------------|--------|
| #36 | antidepress*:ti,ab,kw,tn OR anti-depress*:ti,ab,kw,tn OR neurothymoleptic*:ti,ab,kw,tn OR thymoanaleptic*:ti,ab,kw,tn OR 'thymoleptic*:ti,ab,kw,tn OR psychoenergizer:ti,ab,kw,tn                                                                                                                                                                                                                                                                                                                                                                                                                                                                                                                                                                                                                                                                                                                                                                                                                                                                                                                                                                                                                                                                                                                                                                                                                                                                                                                                                                                                                                                                                                                                      | 116112 |
| #35 | anticonvuls*:ti,ab,kw,tn OR antiepileptic*:ti,ab,kw,tn OR 'anti convuls*:ti,ab,kw,tn OR 'anti epileptic*:ti,ab,kw,tn                                                                                                                                                                                                                                                                                                                                                                                                                                                                                                                                                                                                                                                                                                                                                                                                                                                                                                                                                                                                                                                                                                                                                                                                                                                                                                                                                                                                                                                                                                                                                                                                   | 85756  |
| #34 | azzalure:ti,ab,kw,tn OR bocouture:ti,ab,kw,tn OR 'boe tox':ti,ab,kw,tn OR meditoxin:ti,ab,kw,tn OR botox:ti,ab,kw,tn OR cunox:ti,ab,kw,tn OR daxibotulinum:ti,ab,kw,tn OR daxxify:ti,ab,kw,tn OR dyslor:ti,ab,kw,tn OR dysport:ti,ab,kw,tn OR evabotulinum:ti,ab,kw,tn OR evosyal:ti,ab,kw,tn OR gemibotulinum:ti,ab,kw,tn OR hutox:ti,ab,kw,tn OR incobotulinum:ti,ab,kw,tn OR jeuveau:ti,ab,kw,tn OR letibotulinum:ti,ab,kw,tn OR neuronox:ti,ab,kw,tn OR nabota:ti,ab,kw,tn OR nivobotulinum:ti,ab,kw,tn OR nuceiva:ti,ab,kw,tn OR oculinum:ti,ab,kw,tn OR onabotulinum*:ti,ab,kw,tn OR onaclostox:ti,ab,kw,tn OR prabotulinum*:ti,ab,kw,tn OR prosigne:ti,ab,kw,tn OR purtox:ti,ab,kw,tn OR reloxin:ti,ab,kw,tn OR relabotulinum*:ti,ab,kw,tn OR vistabel:ti,ab,kw,tn OR vistabex:ti,ab,kw,tn OR xeom*:ti,ab,kw,tn                                                                                                                                                                                                                                                                                                                                                                                                                                                                                                                                                                                                                                                                                                                                                                                                                                                                                                 | 13330  |
| #33 | 'botulinum neurotoxin*:ti,ab,kw,tn OR 'botul* toxin*:ti,ab,kw,tn OR botulin:ti,ab,kw,tn                                                                                                                                                                                                                                                                                                                                                                                                                                                                                                                                                                                                                                                                                                                                                                                                                                                                                                                                                                                                                                                                                                                                                                                                                                                                                                                                                                                                                                                                                                                                                                                                                                | 28647  |
| #32 | acetaminophen:ti,ab,kw,tn OR alvedon:ti,ab,kw,tn OR hydroxyacetanilide:ti,ab,kw,tn OR apap:ti,ab,kw,tn OR 'p acetamidophenol':ti,ab,kw,tn OR 'p hydroxyacetanilide':ti,ab,kw,tn OR paracetamol:ti,ab,kw,tn OR acetamidophenol:ti,ab,kw,tn OR acephen:ti,ab,kw,tn OR acetaco:ti,ab,kw,tn OR tylenol:ti,ab,kw,tn OR anacin\$:ti,ab,kw,tn OR datril:ti,ab,kw,tn OR panadol:ti,ab,kw,tn OR acamol:ti,ab,kw,tn OR algotropyl:ti,ab,kw,tn                                                                                                                                                                                                                                                                                                                                                                                                                                                                                                                                                                                                                                                                                                                                                                                                                                                                                                                                                                                                                                                                                                                                                                                                                                                                                    | 50430  |
| #31 | nri*:ti,ab,kw,tn OR norepinephrine:ti,ab,kw,tn OR snri*:ti,ab,kw,tn                                                                                                                                                                                                                                                                                                                                                                                                                                                                                                                                                                                                                                                                                                                                                                                                                                                                                                                                                                                                                                                                                                                                                                                                                                                                                                                                                                                                                                                                                                                                                                                                                                                    | 83225  |
| #30 | ssri*:ti,ab,kw,tn OR serotonin*:ti,ab,kw,tn                                                                                                                                                                                                                                                                                                                                                                                                                                                                                                                                                                                                                                                                                                                                                                                                                                                                                                                                                                                                                                                                                                                                                                                                                                                                                                                                                                                                                                                                                                                                                                                                                                                                            | 141188 |
| #29 | convalis:ti,ab,kw,tn OR dineurin:ti,ab,kw,tn OR gabalept:ti,ab,kw,tn OR gabaliquid:ti,ab,kw,tn OR geriasan:ti,ab,kw,tn OR gabapen*:ti,ab,kw,tn OR gabatin:ti,ab,kw,tn OR gantin:ti,ab,kw,tn OR gralise:ti,ab,kw,tn OR kaptin:ti,ab,kw,tn OR keneil:ti,ab,kw,tn OR neurontin:ti,ab,kw,tn OR neurotonin:ti,ab,kw,tn OR nupentin:ti,ab,kw,tn OR sefelsa:ti,ab,kw,tn OR serada:ti,ab,kw,tn                                                                                                                                                                                                                                                                                                                                                                                                                                                                                                                                                                                                                                                                                                                                                                                                                                                                                                                                                                                                                                                                                                                                                                                                                                                                                                                                 | 14702  |
| #28 | 'apo carbamazepine':ti,ab,kw,tn OR amizepin*:ti,ab,kw,tn OR atretol:ti,ab,kw,tn OR carbamazepine:ti,ab,kw,tn OR carbazepin:ti,ab,kw,tn OR bipotrol:ti,ab,kw,tn OR biston:ti,ab,kw,tn OR calepsin:ti,ab,kw,tn OR camapine:ti,ab,kw,tn OR carbadac:ti,ab,kw,tn OR carbadura:ti,ab,kw,tn OR carbagen:ti,ab,kw,tn OR carbalex:ti,ab,kw,tn OR carbategral:ti,ab,kw,tn OR carbatol:ti,ab,kw,tn OR carbatrol:ti,ab,kw,tn OR carbazene:ti,ab,kw,tn OR carbazep:ti,ab,kw,tn OR carbazina:ti,ab,kw,tn OR carbella:ti,ab,kw,tn OR carbepsil:ti,ab,kw,tn OR carmaz:ti,ab,kw,tn OR carnexiv:ti,ab,kw,tn OR carpaz:ti,ab,kw,tn OR carzepin:ti,ab,kw,tn OR carzepine:ti,ab,kw,tn OR clostedal:ti,ab,kw,tn OR convuline:ti,ab,kw,tn OR curtail:ti,ab,kw,tn OR epileptol:ti,ab,kw,tn OR epimax:ti,ab,kw,tn OR epitol:ti,ab,kw,tn OR 'eposal retard':ti,ab,kw,tn OR equetro:ti,ab,kw,tn OR 'espa lepsin':ti,ab,kw,tn OR finlepsin:ti,ab,kw,tn OR foxalepsin:ti,ab,kw,tn OR hermolepsin:ti,ab,kw,tn OR karbamazepin:ti,ab,kw,tn OR karbelex:ti,ab,kw,tn OR kodapan:ti,ab,kw,tn OR lexin:ti,ab,kw,tn OR mazepine:ti,ab,kw,tn OR mazetol:ti,ab,kw,tn OR neugeron:ti,ab,kw,tn OR neurotol:ti,ab,kw,tn OR neurotop:ti,ab,kw,tn OR nordotol:ti,ab,kw,tn OR painbrake:ti,ab,kw,tn OR panitol:ti,ab,kw,tn OR servimazepin:ti,ab,kw,tn OR sirtal:ti,ab,kw,tn OR stazepine:ti,ab,kw,tn OR storilat:ti,ab,kw,tn OR syntopine:ti,ab,kw,tn OR tardotol:ti,ab,kw,tn OR taver:ti,ab,kw,tn OR tegol:ti,ab,kw,tn OR tegral:ti,ab,kw,tn OR tegretal:ti,ab,kw,tn OR tegretol:ti,ab,kw,tn OR tripleptal:ti,ab,kw,tn OR timox:ti,ab,kw,tn OR temporol:ti,ab,kw,tn OR teril:ti,ab,kw,tn OR timonil:ti,ab,kw,tn OR tegrital:ti,ab,kw,tn OR telesmin:ti,ab,kw,tn | 31799  |
| #27 | pregabalin:ti,ab,kw,tn OR lyrica:ti,ab,kw,tn OR vronogabic:ti,ab,kw,tn                                                                                                                                                                                                                                                                                                                                                                                                                                                                                                                                                                                                                                                                                                                                                                                                                                                                                                                                                                                                                                                                                                                                                                                                                                                                                                                                                                                                                                                                                                                                                                                                                                                 | 8214   |
| #26 | 'local anesthetic*':ti,ab,kw,tn OR 'conduction-blocking anesthetic*':ti,ab,kw,tn OR 'topical anesthetic*':ti,ab,kw,tn                                                                                                                                                                                                                                                                                                                                                                                                                                                                                                                                                                                                                                                                                                                                                                                                                                                                                                                                                                                                                                                                                                                                                                                                                                                                                                                                                                                                                                                                                                                                                                                                  | 28403  |

|     |                                                                                                                                                                                                                                                                                                                                                                                                                                                                           |         |
|-----|---------------------------------------------------------------------------------------------------------------------------------------------------------------------------------------------------------------------------------------------------------------------------------------------------------------------------------------------------------------------------------------------------------------------------------------------------------------------------|---------|
| #25 | granisetron:ti,ab,kw,tn OR hydrochloride:ti,ab,kw,tn OR kytril:ti,ab,kw,tn OR sustol:ti,ab,kw,tn OR taraz:ti,ab,kw,tn OR viatrinil:ti,ab,kw,tn OR pandiol:ti,ab,kw,tn OR rasetron:ti,ab,kw,tn OR sancuso:ti,ab,kw,tn OR granisol:ti,ab,kw,tn OR granissetrom:ti,ab,kw,tn OR granitron:ti,ab,kw,tn OR kevatril:ti,ab,kw,tn OR emegar:ti,ab,kw,tn OR eutrom:ti,ab,kw,tn OR granegis:ti,ab,kw,tn OR 'grani denk':ti,ab,kw,tn OR granicip:ti,ab,kw,tn OR granigen:ti,ab,kw,tn | 74251   |
| #24 | anodynes:ti,ab,kw,tn OR analgesic*:ti,ab,kw,tn OR antinociceptive:ti,ab,kw,tn OR opioid*:ti,ab,kw,tn OR opioid*:ti,ab,kw,tn                                                                                                                                                                                                                                                                                                                                               | 274434  |
| #23 | 'antiinflammatory':ti,ab,kw,tn OR 'anti inflammatory':ti,ab,kw,tn OR nsaid\$:ti,ab,kw,tn OR 'aspirin like agent\$':ti,ab,kw,tn                                                                                                                                                                                                                                                                                                                                            | 337491  |
| #22 | glucocort*:ti,ab,kw,tn OR glycocort*:ti,ab,kw,tn                                                                                                                                                                                                                                                                                                                                                                                                                          | 113436  |
| #21 | 'glucocorticoid'/de                                                                                                                                                                                                                                                                                                                                                                                                                                                       | 104513  |
| #20 | 'analgesic agent'/exp                                                                                                                                                                                                                                                                                                                                                                                                                                                     | 1190185 |
| #19 | 'granisetron'/de                                                                                                                                                                                                                                                                                                                                                                                                                                                          | 5864    |
| #18 | 'local anesthetic agent'/exp                                                                                                                                                                                                                                                                                                                                                                                                                                              | 290859  |
| #17 | 'pregabalin'/de                                                                                                                                                                                                                                                                                                                                                                                                                                                           | 18265   |
| #16 | 'carbamazepine'/de                                                                                                                                                                                                                                                                                                                                                                                                                                                        | 71073   |
| #15 | 'gabapentin'/de                                                                                                                                                                                                                                                                                                                                                                                                                                                           | 37290   |
| #14 | 'neurotransmitter uptake inhibitor'/de                                                                                                                                                                                                                                                                                                                                                                                                                                    | 171     |
| #13 | 'paracetamol'/de                                                                                                                                                                                                                                                                                                                                                                                                                                                          | 110194  |
| #12 | 'botulinum toxin'/de OR 'botulinum toxin a'/de OR 'botulinum toxin b'/de                                                                                                                                                                                                                                                                                                                                                                                                  | 43804   |
| #11 | 'serotonin receptor affecting agent'/exp                                                                                                                                                                                                                                                                                                                                                                                                                                  | 638345  |
| #10 | 'anticonvulsive agent'/exp                                                                                                                                                                                                                                                                                                                                                                                                                                                | 496790  |
| #9  | 'antidepressant agent'/exp                                                                                                                                                                                                                                                                                                                                                                                                                                                | 578338  |
| #8  | 'antiinflammatory agent'/exp                                                                                                                                                                                                                                                                                                                                                                                                                                              | 2603662 |
| #7  | #1 OR #2 OR #3 OR #4 OR #5 OR #6                                                                                                                                                                                                                                                                                                                                                                                                                                          | 42073   |
| #6  | 'costen* syndrom*':ti,ab,kw OR tmd*:ti,ab,kw                                                                                                                                                                                                                                                                                                                                                                                                                              | 13911   |
| #5  | ((myofascial OR orofacial) NEAR/2 (pain* OR syndrom* OR 'trigger point*')):ti,ab,kw                                                                                                                                                                                                                                                                                                                                                                                       | 8396    |
| #4  | ((jaw OR temporomandibular OR tmj) NEAR/3 (arthropath* OR disease* OR dislocation* OR disorder* OR dysfuncti* OR luxation* OR pain* OR subluxation* OR syndrom*)):ti,ab,kw                                                                                                                                                                                                                                                                                                | 16337   |
| #3  | (craniomandibular NEAR/3 (arthropath* OR disease* OR disorder* OR dysfuncti* OR pain* OR syndrom*)):ti,ab,kw                                                                                                                                                                                                                                                                                                                                                              | 793     |
| #2  | 'myofascial pain'/de                                                                                                                                                                                                                                                                                                                                                                                                                                                      | 8758    |
| #1  | 'temporomandibular joint disorder'/exp                                                                                                                                                                                                                                                                                                                                                                                                                                    | 16823   |

### 3. Cochrane Library

| Interface: Wiley                    |                                                                                                                                                                                                                                                                                                                                                                                                                  | Field labels                                                                                                                                                                                                       |
|-------------------------------------|------------------------------------------------------------------------------------------------------------------------------------------------------------------------------------------------------------------------------------------------------------------------------------------------------------------------------------------------------------------------------------------------------------------|--------------------------------------------------------------------------------------------------------------------------------------------------------------------------------------------------------------------|
| Date of Search: <b>6 April 2023</b> |                                                                                                                                                                                                                                                                                                                                                                                                                  | <ul style="list-style-type: none"> <li>• ti,ab,kw = title, abstract and author keywords</li> <li>• NEAR/x = within x words, regardless of order</li> <li>• * = truncation of word for alternate endings</li> </ul> |
| Number of hits: <b>922</b>          |                                                                                                                                                                                                                                                                                                                                                                                                                  |                                                                                                                                                                                                                    |
| ID                                  | Search                                                                                                                                                                                                                                                                                                                                                                                                           | Hits                                                                                                                                                                                                               |
| #1                                  | [mh "Craniomandibular Disorders"]                                                                                                                                                                                                                                                                                                                                                                                | 1036                                                                                                                                                                                                               |
| #2                                  | [mh "Myofascial Pain Syndromes"]                                                                                                                                                                                                                                                                                                                                                                                 | 1485                                                                                                                                                                                                               |
| #3                                  | (Craniomandibular:ti,ab,kw NEAR/3 (arthropath*:ti,ab,kw OR disease*:ti,ab,kw OR disorder*:ti,ab,kw OR dysfuncti*:ti,ab,kw OR pain*:ti,ab,kw OR syndrom*:ti,ab,kw))                                                                                                                                                                                                                                               | 73                                                                                                                                                                                                                 |
| #4                                  | ((jaw:ti,ab,kw OR temporomandibular:ti,ab,kw OR tmj:ti,ab,kw) NEAR/3 (arthropath*:ti,ab,kw OR disease*:ti,ab,kw OR dislocation*:ti,ab,kw OR disorder*:ti,ab,kw OR dysfuncti*:ti,ab,kw OR luxation*:ti,ab,kw OR pain*:ti,ab,kw OR subluxation*:ti,ab,kw OR syndrom*:ti,ab,kw))                                                                                                                                    | 2389                                                                                                                                                                                                               |
| #5                                  | ((myofascial:ti,ab,kw OR orofacial:ti,ab,kw) NEAR/2 (pain*:ti,ab,kw OR syndrom*:ti,ab,kw OR ("trigger" NEXT point*):ti,ab,kw))                                                                                                                                                                                                                                                                                   | 2732                                                                                                                                                                                                               |
| #6                                  | ((costen* NEXT syndrom*):ti,ab,kw OR tmd*:ti,ab,kw)                                                                                                                                                                                                                                                                                                                                                              | 1211                                                                                                                                                                                                               |
| #7                                  | #1 OR #2 OR #3 OR #4 OR #5 OR #6                                                                                                                                                                                                                                                                                                                                                                                 | 5058                                                                                                                                                                                                               |
| #8                                  | [mh "Anti-Inflammatory Agents"]                                                                                                                                                                                                                                                                                                                                                                                  | 15233                                                                                                                                                                                                              |
| #9                                  | [mh "Antidepressive Agents"]                                                                                                                                                                                                                                                                                                                                                                                     | 6974                                                                                                                                                                                                               |
| #10                                 | [mh ^Anticonvulsants]                                                                                                                                                                                                                                                                                                                                                                                            | 2966                                                                                                                                                                                                               |
| #11                                 | [mh "Serotonin Agents"]                                                                                                                                                                                                                                                                                                                                                                                          | 5208                                                                                                                                                                                                               |
| #12                                 | [mh "Botulinum Toxins"]                                                                                                                                                                                                                                                                                                                                                                                          | 2344                                                                                                                                                                                                               |
| #13                                 | [mh ^Acetaminophen]                                                                                                                                                                                                                                                                                                                                                                                              | 3710                                                                                                                                                                                                               |
| #14                                 | [mh "Neurotransmitter Uptake Inhibitors"]                                                                                                                                                                                                                                                                                                                                                                        | 3967                                                                                                                                                                                                               |
| #15                                 | [mh ^Gabapentin]                                                                                                                                                                                                                                                                                                                                                                                                 | 1011                                                                                                                                                                                                               |
| #16                                 | [mh ^Carbamazepine]                                                                                                                                                                                                                                                                                                                                                                                              | 888                                                                                                                                                                                                                |
| #17                                 | [mh ^Pregabalin]                                                                                                                                                                                                                                                                                                                                                                                                 | 979                                                                                                                                                                                                                |
| #18                                 | [mh ^"Anesthetics, local"]                                                                                                                                                                                                                                                                                                                                                                                       | 9749                                                                                                                                                                                                               |
| #19                                 | [mh ^Granisetron]                                                                                                                                                                                                                                                                                                                                                                                                | 467                                                                                                                                                                                                                |
| #20                                 | [mh Analgesics]                                                                                                                                                                                                                                                                                                                                                                                                  | 24954                                                                                                                                                                                                              |
| #21                                 | [mh ^Glucocorticoids]                                                                                                                                                                                                                                                                                                                                                                                            | 5301                                                                                                                                                                                                               |
| #22                                 | (Glucocort*:ti,ab,kw OR glycocort*:ti,ab,kw)                                                                                                                                                                                                                                                                                                                                                                     | 10549                                                                                                                                                                                                              |
| #23                                 | ((antiinflammatory):ti,ab,kw OR ("anti inflammatory"):ti,ab,kw OR NSAID*:ti,ab,kw OR ("Aspirin Like" NEXT Agent*):ti,ab,kw)                                                                                                                                                                                                                                                                                      | 37096                                                                                                                                                                                                              |
| #24                                 | (Anodynes:ti,ab,kw OR Analgesic*:ti,ab,kw OR Antinociceptive:ti,ab,kw OR opioid*:ti,ab,kw OR opioid*:ti,ab,kw)                                                                                                                                                                                                                                                                                                   | 64464                                                                                                                                                                                                              |
| #25                                 | (Granisetron:ti,ab,kw OR Hydrochloride:ti,ab,kw OR Kytril:ti,ab,kw OR sustol:ti,ab,kw OR taraz:ti,ab,kw OR viatrinil:ti,ab,kw OR pandiol:ti,ab,kw OR rasetron:ti,ab,kw OR sancuso:ti,ab,kw OR granisol:ti,ab,kw OR granissetrom:ti,ab,kw OR granitron:ti,ab,kw OR kevatril:ti,ab,kw OR emegar:ti,ab,kw OR eutrom:ti,ab,kw OR granegis:ti,ab,kw OR grandidenk:ti,ab,kw OR granicip:ti,ab,kw OR granigen:ti,ab,kw) | 18016                                                                                                                                                                                                              |
| #26                                 | ((("Local" NEXT Anesthetic*):ti,ab,kw OR ("Conduction-Blocking" NEXT Anesthetic*):ti,ab,kw OR ("Topical" NEXT Anesthetic*):ti,ab,kw)                                                                                                                                                                                                                                                                             | 9685                                                                                                                                                                                                               |
| #27                                 | (Pregabalin:ti,ab,kw OR Lyrica:ti,ab,kw OR vronogabic:ti,ab,kw)                                                                                                                                                                                                                                                                                                                                                  | 2494                                                                                                                                                                                                               |



|     |                                                                                                                                                                                                                                                                                                                                                                                                                                                                                                                                                                                                                                                                                                                                                                                                                                                                                                                                                                                                                                                                                                                                                                                                                                                                                                                                                                                                                                                                                                         |       |
|-----|---------------------------------------------------------------------------------------------------------------------------------------------------------------------------------------------------------------------------------------------------------------------------------------------------------------------------------------------------------------------------------------------------------------------------------------------------------------------------------------------------------------------------------------------------------------------------------------------------------------------------------------------------------------------------------------------------------------------------------------------------------------------------------------------------------------------------------------------------------------------------------------------------------------------------------------------------------------------------------------------------------------------------------------------------------------------------------------------------------------------------------------------------------------------------------------------------------------------------------------------------------------------------------------------------------------------------------------------------------------------------------------------------------------------------------------------------------------------------------------------------------|-------|
| #28 | (apo-carbamazepine:ti,ab,kw OR Amizepin*:ti,ab,kw OR atretol:ti,ab,kw OR Carbamazepine:ti,ab,kw OR Carbazepin:ti,ab,kw OR Bipotrol:ti,ab,kw OR biston:ti,ab,kw OR calepsin:ti,ab,kw OR camapine:ti,ab,kw OR carbadac:ti,ab,kw OR carbadura:ti,ab,kw OR carbagen:ti,ab,kw OR carbalex:ti,ab,kw OR carbategral:ti,ab,kw OR carbatol:ti,ab,kw OR carbatrol:ti,ab,kw OR carbazene:ti,ab,kw OR carbazep:ti,ab,kw OR carbazina:ti,ab,kw OR carbella:ti,ab,kw OR carbepsil:ti,ab,kw OR carmaz:ti,ab,kw OR carnexiv:ti,ab,kw OR carpaz:ti,ab,kw OR carzepin:ti,ab,kw OR carzepine:ti,ab,kw OR clostedal:ti,ab,kw OR convuline:ti,ab,kw OR curtail:ti,ab,kw OR epileptol:ti,ab,kw OR epimax:ti,ab,kw OR epitol:ti,ab,kw OR "eposal retard":ti,ab,kw OR equetro:ti,ab,kw OR espa-lepsin:ti,ab,kw OR finlepsin:ti,ab,kw OR foxalepsin:ti,ab,kw OR hermolepsin:ti,ab,kw OR karbamazepin:ti,ab,kw OR karbelex:ti,ab,kw OR kodapan:ti,ab,kw OR lexin:ti,ab,kw OR mazepine:ti,ab,kw OR mazetol:ti,ab,kw OR neugeron:ti,ab,kw OR neurotol:ti,ab,kw OR neurotop:ti,ab,kw OR nordotol:ti,ab,kw OR painbrake:ti,ab,kw OR panitol:ti,ab,kw OR servimazepin:ti,ab,kw OR sirtal:ti,ab,kw OR stazepine:ti,ab,kw OR storilat:ti,ab,kw OR syntopine:ti,ab,kw OR tardotol:ti,ab,kw OR taver:ti,ab,kw OR tegol:ti,ab,kw OR tegral:ti,ab,kw OR tegretal:ti,ab,kw OR tegretol:ti,ab,kw OR Trileptal:ti,ab,kw OR Timox:ti,ab,kw OR temporol:ti,ab,kw OR teril:ti,ab,kw OR timonil:ti,ab,kw OR tegrital:ti,ab,kw OR telesmin:ti,ab,kw) | 2353  |
| #29 | (Convalis:ti,ab,kw OR dineurin:ti,ab,kw OR gabalept:ti,ab,kw OR gabaliquid:ti,ab,kw OR geriasan:ti,ab,kw OR Gabapen*:ti,ab,kw OR gabatin:ti,ab,kw OR gantin:ti,ab,kw OR gralise:ti,ab,kw OR kaptin:ti,ab,kw OR keneil:ti,ab,kw OR Neurontin:ti,ab,kw OR neurotonin:ti,ab,kw OR nupentin:ti,ab,kw OR sefelsa:ti,ab,kw OR serada:ti,ab,kw)                                                                                                                                                                                                                                                                                                                                                                                                                                                                                                                                                                                                                                                                                                                                                                                                                                                                                                                                                                                                                                                                                                                                                                | 2846  |
| #30 | (SSRI*:ti,ab,kw OR Serotonin*:ti,ab,kw)                                                                                                                                                                                                                                                                                                                                                                                                                                                                                                                                                                                                                                                                                                                                                                                                                                                                                                                                                                                                                                                                                                                                                                                                                                                                                                                                                                                                                                                                 | 13192 |
| #31 | (NRI*:ti,ab,kw OR Norepinephrine:ti,ab,kw OR SNRI*:ti,ab,kw)                                                                                                                                                                                                                                                                                                                                                                                                                                                                                                                                                                                                                                                                                                                                                                                                                                                                                                                                                                                                                                                                                                                                                                                                                                                                                                                                                                                                                                            | 7848  |
| #32 | (Acetaminophen:ti,ab,kw OR alvedon:ti,ab,kw OR Hydroxyacetanilide:ti,ab,kw OR APAP:ti,ab,kw OR p-Acetamidophenol:ti,ab,kw OR p-Hydroxyacetanilide:ti,ab,kw OR Paracetamol:ti,ab,kw OR Acetamidophenol:ti,ab,kw OR Acephen:ti,ab,kw OR Acetaco:ti,ab,kw OR Tylenol:ti,ab,kw OR Anacin*:ti,ab,kw OR Datriil:ti,ab,kw OR Panadol:ti,ab,kw OR Acamol:ti,ab,kw OR Algotrotyl:ti,ab,kw)                                                                                                                                                                                                                                                                                                                                                                                                                                                                                                                                                                                                                                                                                                                                                                                                                                                                                                                                                                                                                                                                                                                       | 12456 |
| #33 | (("Botulinum" NEXT Neurotoxin*):ti,ab,kw OR (Botul* NEXT Toxin*):ti,ab,kw OR Botulin:ti,ab,kw)                                                                                                                                                                                                                                                                                                                                                                                                                                                                                                                                                                                                                                                                                                                                                                                                                                                                                                                                                                                                                                                                                                                                                                                                                                                                                                                                                                                                          | 4758  |
| #34 | (azzalure:ti,ab,kw OR Bocouture:ti,ab,kw OR boe-tox:ti,ab,kw OR Meditoxin:ti,ab,kw OR Botox:ti,ab,kw OR cunox:ti,ab,kw OR daxibotulinum:ti,ab,kw OR daxxify:ti,ab,kw OR dyslor:ti,ab,kw OR Dysport:ti,ab,kw OR evabotulinum:ti,ab,kw OR evosyal:ti,ab,kw OR gemibotulinum:ti,ab,kw OR hutox:ti,ab,kw OR Incobotulinum:ti,ab,kw OR jeuveau:ti,ab,kw OR letibotulinum:ti,ab,kw OR Neuronox:ti,ab,kw OR nabota:ti,ab,kw OR nivobotulinum:ti,ab,kw OR nuceiva:ti,ab,kw OR Oculinum:ti,ab,kw OR Onabotulinum*:ti,ab,kw OR onaclostox:ti,ab,kw OR prabotulinum*:ti,ab,kw OR prosigne:ti,ab,kw OR Purtox:ti,ab,kw OR relaxin:ti,ab,kw OR relabotulinum*:ti,ab,kw OR Vistabel:ti,ab,kw OR Vistabex:ti,ab,kw OR xeom*:ti,ab,kw)                                                                                                                                                                                                                                                                                                                                                                                                                                                                                                                                                                                                                                                                                                                                                                                  | 2572  |
| #35 | (Anticonvuls*:ti,ab,kw OR Antiepileptic*:ti,ab,kw OR anti-convuls*:ti,ab,kw OR anti-epileptic*:ti,ab,kw)                                                                                                                                                                                                                                                                                                                                                                                                                                                                                                                                                                                                                                                                                                                                                                                                                                                                                                                                                                                                                                                                                                                                                                                                                                                                                                                                                                                                | 6322  |



|     |                                                                                                                                                                                                                     |        |
|-----|---------------------------------------------------------------------------------------------------------------------------------------------------------------------------------------------------------------------|--------|
| #36 | (Antidepress*:ti,ab,kw OR anti-depress*:ti,ab,kw OR neurothymoleptic*:ti,ab,kw OR Thymoanaleptic*:ti,ab,kw OR Thymoleptic*:ti,ab,kw OR psychoenergizer:ti,ab,kw)                                                    | 18062  |
| #37 | (("Neurotransmitter uptake" NEXT inhibitor*):ti,ab,kw OR Adrenergic:ti,ab,kw OR GABA:ti,ab,kw)                                                                                                                      | 20482  |
| #38 | (cyclooxygenase:ti,ab,kw OR "Cyclo Oxygenase":ti,ab,kw OR prostaglandin*:ti,ab,kw)                                                                                                                                  | 10928  |
| #39 | #8 OR #9 OR #10 OR #11 OR #12 OR #13 OR #14 OR #15 OR #16 OR #17 OR #18 OR #19 OR #20 OR #21 OR #22 OR #23 OR #24 OR #25 OR #26 OR #27 OR #28 OR #29 OR #30 OR #31 OR #32 OR #33 OR #34 OR #35 OR #36 OR #37 OR #38 | 200118 |
| #40 | #7 AND #39 in Trials                                                                                                                                                                                                | 922    |

## 4. Web of Science Core Collection

|                                                                                                                                                                             |                                                                                                                                                                                                                                                                                                                                   |
|-----------------------------------------------------------------------------------------------------------------------------------------------------------------------------|-----------------------------------------------------------------------------------------------------------------------------------------------------------------------------------------------------------------------------------------------------------------------------------------------------------------------------------|
| <p>Interface: Clarivate Analytics</p> <p>Editions = A&amp;HCI , ESCI , SCI-EXPANDED , SSCI</p> <p>Date of Search: <b>5 April 2023</b></p> <p>Number of hits: <b>673</b></p> | <p>Field labels</p> <ul style="list-style-type: none"> <li>• TS/Topic = title, abstract, author keywords and Keywords Plus</li> <li>• NEAR/x = within x words, regardless of order</li> <li>• * = truncation of word for alternate endings</li> </ul> <p>Note: the <i>Exact search</i>-function was used for all the searches</p> |
|-----------------------------------------------------------------------------------------------------------------------------------------------------------------------------|-----------------------------------------------------------------------------------------------------------------------------------------------------------------------------------------------------------------------------------------------------------------------------------------------------------------------------------|

| #  | Search Query                                                                                                                                                                                                                                                                                                                                                                                                                                                                                                                                                                                                                                                                                                                                                                                                                                                           | Results |
|----|------------------------------------------------------------------------------------------------------------------------------------------------------------------------------------------------------------------------------------------------------------------------------------------------------------------------------------------------------------------------------------------------------------------------------------------------------------------------------------------------------------------------------------------------------------------------------------------------------------------------------------------------------------------------------------------------------------------------------------------------------------------------------------------------------------------------------------------------------------------------|---------|
| 1  | TS=(Cranio-mandibular NEAR/2 (arthropath* OR disease* OR disorder* OR dysfuncti* OR pain* OR syndrom* ))                                                                                                                                                                                                                                                                                                                                                                                                                                                                                                                                                                                                                                                                                                                                                               | 811     |
| 2  | TS=((jaw OR temporomandibular OR tmj ) NEAR/2 (arthropath* OR disease* OR dislocation* OR disorder* OR dysfuncti* OR luxation* OR pain* OR subluxation* OR syndrom* ))                                                                                                                                                                                                                                                                                                                                                                                                                                                                                                                                                                                                                                                                                                 | 12506   |
| 3  | TS=((myofascial OR orofacial ) NEAR/1 (pain* OR syndrom* OR "trigger point*" ))                                                                                                                                                                                                                                                                                                                                                                                                                                                                                                                                                                                                                                                                                                                                                                                        | 7612    |
| 4  | TS=("costen* syndrom*" OR tmd* )                                                                                                                                                                                                                                                                                                                                                                                                                                                                                                                                                                                                                                                                                                                                                                                                                                       | 19812   |
| 5  | #1 OR #2 OR #3 OR #4                                                                                                                                                                                                                                                                                                                                                                                                                                                                                                                                                                                                                                                                                                                                                                                                                                                   | 33638   |
| 6  | TS=(Glucocort* OR glyocort* )                                                                                                                                                                                                                                                                                                                                                                                                                                                                                                                                                                                                                                                                                                                                                                                                                                          | 100944  |
| 7  | TS=("anti-inflammatory" OR "anti inflammatory" OR NSAID\$ OR "Aspirin Like Agent\$" )                                                                                                                                                                                                                                                                                                                                                                                                                                                                                                                                                                                                                                                                                                                                                                                  | 230115  |
| 8  | TS=(Anodynes OR Analgesic* OR Antinociceptive OR opioid* OR opioid*)                                                                                                                                                                                                                                                                                                                                                                                                                                                                                                                                                                                                                                                                                                                                                                                                   | 202303  |
| 9  | TS=(Granisetron OR Hydrochloride OR Kytril OR sustol OR taraz OR viatrinil OR pandiol OR rasetron OR sancuso OR granisol OR granissetrom OR granitron OR kevatril OR emegar OR eutrom OR granegis OR grani-denk OR granicip OR granigen )                                                                                                                                                                                                                                                                                                                                                                                                                                                                                                                                                                                                                              | 75863   |
| 10 | TS=("Local Anesthetic*" OR "Conduction-Blocking Anesthetic*" OR "Topical Anesthetic*" )                                                                                                                                                                                                                                                                                                                                                                                                                                                                                                                                                                                                                                                                                                                                                                                | 21202   |
| 11 | TS=(Pregabalin OR Lyrica OR vronogabic )                                                                                                                                                                                                                                                                                                                                                                                                                                                                                                                                                                                                                                                                                                                                                                                                                               | 5897    |
| 12 | TS=(apo-carbamazepine OR Amizepin* OR atretol OR Carbamazepine OR Carbazepin OR Bipotrol OR biston OR calepsin OR camapine OR carbadac OR carbadura OR carbagen OR carbalex OR carbategral OR carbatol OR carbatrol OR carbazene OR carbazep OR carbazina OR carbella OR carbepsil OR carmaz OR carnexiv OR carpaz OR carzepin OR carzepine OR clostedal OR convuline OR curtail OR epileptol OR epimax OR epitol OR ""eposal retard"" OR equetro OR espa-lepsin OR finlepsin OR foxalepsin OR hermolepsin OR karbamazepin OR karbelex OR kodapan OR lexin OR mazepine OR mazetol OR neugeron OR neurotol OR neurotop OR nordotol OR painbrake OR panitol OR servimazepin OR sirtal OR stazepine OR storilat OR syntopine OR tardotol OR taver OR tegol OR tegral OR tegretal OR tegretol OR Trileptal OR Timox OR temporol OR teril OR timonil OR tegral OR elesmin ) | 28461   |
| 13 | TS=(Convalis OR dineurin OR gabalept OR gabaliquid OR geriasan OR Gabapen* OR gabatin OR gantin OR gralise OR kaptin OR keneil OR Neurontin OR neurotonin OR nupentin OR sefelsa OR serada )                                                                                                                                                                                                                                                                                                                                                                                                                                                                                                                                                                                                                                                                           | 10675   |
| 14 | TS=(SSRI* OR Serotonin* )                                                                                                                                                                                                                                                                                                                                                                                                                                                                                                                                                                                                                                                                                                                                                                                                                                              | 131736  |

|    |                                                                                                                                                                                                                                                                                                                                                                                                                            |         |
|----|----------------------------------------------------------------------------------------------------------------------------------------------------------------------------------------------------------------------------------------------------------------------------------------------------------------------------------------------------------------------------------------------------------------------------|---------|
| 15 | TS=(NRI* OR Norepinephrine OR SNRI* )                                                                                                                                                                                                                                                                                                                                                                                      | 65247   |
| 16 | TS=(Acetaminophen OR alvedon OR Hydroxyacetanilide OR APAP OR p-Acetamidophenol OR p-Hydroxyacetanilide OR Paracetamol OR Acetamidophenol OR Acephen OR Acetaco OR Tylenol OR Anacin\$ OR Datriol OR Panadol OR Acamol OR Algotropyl )                                                                                                                                                                                     | 40783   |
| 17 | TS=("Botulinum Neurotoxin*" OR "Botul* Toxin*" OR Botulin )                                                                                                                                                                                                                                                                                                                                                                | 25861   |
| 18 | TS=(azzalure OR Bocouture OR boe-tox OR Meditoxin OR Botox OR cunox OR daxibotulinum OR daxxify OR dyslor OR Dysport OR evabotulinum OR evosyal OR gemibotulinum OR hutox OR Incobotulinum OR jeuveau OR letibotulinum OR Neuronox OR nabota OR nivobotulinum OR nuceiva OR Oculinum OR Onabotulinum* OR onaclostox OR prabotulinum* OR prosigne OR Purtox OR reloxin OR relabotulinum* OR Vistabel OR Vistabex OR xeom* ) | 6256    |
| 19 | TS=(Anticonvuls* OR Antiepileptic* OR anti-convuls* OR anti-epileptic* )                                                                                                                                                                                                                                                                                                                                                   | 61728   |
| 20 | TS=(Antidepress* OR anti-depress* OR neurothymoleptic* OR Thymoanaleptic* OR Thymoleptic* OR psychoenergizer )                                                                                                                                                                                                                                                                                                             | 93167   |
| 21 | TS=("Neurotransmitter uptake inhibitor*" OR Adrenergic OR GABA )                                                                                                                                                                                                                                                                                                                                                           | 170116  |
| 22 | TS=(cyclooxygenase OR "Cyclo Oxygenase" OR prostaglandin* )                                                                                                                                                                                                                                                                                                                                                                | 158267  |
| 23 | #6 OR #7 OR #8 OR #9 OR #10 OR #11 OR #12 OR #13 OR #14 OR #15 OR #16 OR #17 OR #18 OR #19 OR #20 OR #21 OR #22                                                                                                                                                                                                                                                                                                            | 1237146 |
| 24 | #5 AND #23                                                                                                                                                                                                                                                                                                                                                                                                                 | 2144    |
| 25 | TS=(randomised OR randomized OR randomisation OR randomization OR placebo* OR (random* AND (allocat* OR assign*)) OR (blind* AND (single OR double OR treble OR triple)))                                                                                                                                                                                                                                                  | 1385613 |
| 26 | #24 AND #25                                                                                                                                                                                                                                                                                                                                                                                                                | 673     |

## 5. Cinahl

|                                                                                               |                                                                                                                                                                                                                                                                                                       |
|-----------------------------------------------------------------------------------------------|-------------------------------------------------------------------------------------------------------------------------------------------------------------------------------------------------------------------------------------------------------------------------------------------------------|
| Interface: Ebsco<br><br>Date of Search: <b>6 April 2023</b><br><br>Number of hits: <b>306</b> | Field labels <ul style="list-style-type: none"> <li>• MH+ = exploded Cinahl Heading</li> <li>• MH = non exploded Cinahl Heading</li> <li>• TI = title</li> <li>• AB = abstract</li> <li>• Nx = within x words, regardless of order</li> <li>• * = truncation of word for alternate endings</li> </ul> |
|-----------------------------------------------------------------------------------------------|-------------------------------------------------------------------------------------------------------------------------------------------------------------------------------------------------------------------------------------------------------------------------------------------------------|

  

| #   | Query                                                                                                                                                                                                                                                               | Results   |
|-----|---------------------------------------------------------------------------------------------------------------------------------------------------------------------------------------------------------------------------------------------------------------------|-----------|
| S59 | S35 AND S58                                                                                                                                                                                                                                                         | 306       |
| S58 | S51 NOT S57                                                                                                                                                                                                                                                         | 955,97    |
| S57 | S55 NOT S56                                                                                                                                                                                                                                                         | 212,561   |
| S56 | MH (human)                                                                                                                                                                                                                                                          | 2,656,843 |
| S55 | S52 OR S53 OR S54                                                                                                                                                                                                                                                   | 246,297   |
| S54 | TI (animal model*)                                                                                                                                                                                                                                                  | 3,747     |
| S53 | MH (animal studies)                                                                                                                                                                                                                                                 | 151,431   |
| S52 | MH animals+                                                                                                                                                                                                                                                         | 103,732   |
| S51 | S36 OR S37 OR S38 OR S39 OR S40 OR S41 OR S42 OR S43 OR S44 OR S45 OR S46 OR S47 OR S48 OR S49 OR S50                                                                                                                                                               | 1,003,105 |
| S50 | AB (cluster W3 RCT)                                                                                                                                                                                                                                                 | 488       |
| S49 | MH (crossover design) OR MH (comparative studies)                                                                                                                                                                                                                   | 471,146   |
| S48 | AB (control W5 group)                                                                                                                                                                                                                                               | 142,857   |
| S47 | PT (randomized controlled trial)                                                                                                                                                                                                                                    | 149,924   |
| S46 | MH (placebos)                                                                                                                                                                                                                                                       | 13,671    |
| S45 | MH (sample size) AND AB (assigned OR allocated OR control)                                                                                                                                                                                                          | 4,447     |
| S44 | TI (trial)                                                                                                                                                                                                                                                          | 177,908   |
| S43 | AB (random*)                                                                                                                                                                                                                                                        | 395,334   |
| S42 | TI (randomised OR randomized)                                                                                                                                                                                                                                       | 138,35    |
| S41 | MH cluster sample                                                                                                                                                                                                                                                   | 5,217     |
| S40 | MH pretest-posttest design                                                                                                                                                                                                                                          | 52,307    |
| S39 | MH random assignment                                                                                                                                                                                                                                                | 78,354    |
| S38 | MH single-blind studies                                                                                                                                                                                                                                             | 15,951    |
| S37 | MH double-blind studies                                                                                                                                                                                                                                             | 54,014    |
| S36 | MH randomized controlled trials                                                                                                                                                                                                                                     | 136,729   |
| S35 | S7 AND S34                                                                                                                                                                                                                                                          | 1,103     |
| S34 | S8 OR S9 OR S10 OR S11 OR S12 OR S13 OR S14 OR S15 OR S16 OR S17 OR S18 OR S19 OR S20 OR S21 OR S22 OR S23 OR S24 OR S25 OR S26 OR S27 OR S28 OR S29 OR S30 OR S31 OR S32 OR S33                                                                                    | 303,744   |
| S33 | ((TI cyclooxygenase OR AB cyclooxygenase) OR (TI "Cyclo Oxygenase" OR AB "Cyclo Oxygenase")) OR (TI prostaglandin* OR AB prostaglandin*)                                                                                                                            | 7,235     |
| S32 | ((TI "Neurotransmitter uptake inhibitor*" OR AB "Neurotransmitter uptake inhibitor*") OR (TI Adrenergic OR AB Adrenergic) OR (TI GABA OR AB GABA))                                                                                                                  | 6,572     |
| S31 | ((TI Antidepress* OR AB Antidepress*) OR (TI anti-depress* OR AB anti-depress*) (TI neurothymoleptic* OR AB neurothymoleptic*) OR (TI Thymoanaleptic* OR AB Thymoanaleptic*) OR (TI Thymoleptic* OR AB Thymoleptic*) OR (TI psychoenergizer OR AB psychoenergizer)) | 18,235    |
| S30 | ((TI Anticonvuls* OR AB Anticonvuls*) OR (TI Antiepileptic* OR AB Antiepileptic*) OR (TI anti-convuls* OR AB anti-convuls*) OR (TI anti-epileptic* OR AB anti-epileptic*))                                                                                          | 8,095     |
| S29 | ((TI azzalure OR AB azzalure) OR (TI Bocouture OR AB Bocouture) OR (TI boe-tox OR AB boe-tox) OR (TI Meditoxin OR AB Meditoxin) OR (TI Botox OR AB Botox) OR (TI                                                                                                    | 1,774     |

|     |                                                                                                                                                                                                                                                                                                                                                                                                                                                                                                                                                                                                                                                                                                                                                                                                                                                                                                                                                                                                                                                                                                                                                                                                                                                                                                                                                                                                                                                                                                                                                                                                                                                                                                                                                                                                        |        |
|-----|--------------------------------------------------------------------------------------------------------------------------------------------------------------------------------------------------------------------------------------------------------------------------------------------------------------------------------------------------------------------------------------------------------------------------------------------------------------------------------------------------------------------------------------------------------------------------------------------------------------------------------------------------------------------------------------------------------------------------------------------------------------------------------------------------------------------------------------------------------------------------------------------------------------------------------------------------------------------------------------------------------------------------------------------------------------------------------------------------------------------------------------------------------------------------------------------------------------------------------------------------------------------------------------------------------------------------------------------------------------------------------------------------------------------------------------------------------------------------------------------------------------------------------------------------------------------------------------------------------------------------------------------------------------------------------------------------------------------------------------------------------------------------------------------------------|--------|
|     | cunox OR AB cunox) OR (TI daxibotulinum OR AB daxibotulinum) OR (TI daxxify OR AB daxxify) OR (TI dyslor OR AB dyslor) OR (TI Dysport OR AB Dysport) OR (TI evabotulinum OR AB evabotulinum) OR (TI evosyal OR AB evosyal) OR (TI gemibotulinum OR AB gemibotulinum) OR (TI hutox OR AB hutox) OR (TI Incobotulinum OR AB Incobotulinum) OR (TI jeuveau OR AB jeuveau) OR (TI letibotulinum OR AB letibotulinum) OR (TI Neuronox OR AB Neuronox) OR (TI nabota OR AB nabota) OR (TI nivobotulinum OR AB nivobotulinum) OR (TI nuceiva OR AB nuceiva) OR (TI Oculinum OR AB Oculinum) OR (TI Onabotulinum* OR AB Onabotulinum*) OR (TI onaclostox OR AB onaclostox) OR (TI prabotulinum* OR AB prabotulinum*) OR (TI prosigne OR AB prosigne) OR (TI Purtox OR AB Purtox) OR (TI reloxin OR AB reloxin) OR (TI relabotulinum* OR AB relabotulinum*) OR (TI Vistabel OR AB Vistabel) OR (TI Vistabex OR AB Vistabex) OR (TI xeom* OR AB xeom*))                                                                                                                                                                                                                                                                                                                                                                                                                                                                                                                                                                                                                                                                                                                                                                                                                                                          |        |
| S28 | ((TI "Botulinum Neurotoxin*" OR AB "Botulinum Neurotoxin*") OR (TI "Botul* Toxin*" OR AB "Botul* Toxin*") OR (TI Botulin OR AB Botulin))                                                                                                                                                                                                                                                                                                                                                                                                                                                                                                                                                                                                                                                                                                                                                                                                                                                                                                                                                                                                                                                                                                                                                                                                                                                                                                                                                                                                                                                                                                                                                                                                                                                               | 4,764  |
| S27 | ((TI Acetaminophen OR AB Acetaminophen) OR (TI alvedon OR AB alvedon) OR (TI Hydroxyacetanilide OR AB Hydroxyacetanilide) OR (TI APAP OR AB APAP) OR (TI p-Acetamidophenol OR AB p-Acetamidophenol) OR (TI p-Hydroxyacetanilide OR AB p-Hydroxyacetanilide) OR (TI Paracetamol OR AB Paracetamol) OR (TI Acetamidophenol OR AB Acetamidophenol) OR (TI Acephen OR AB Acephen) OR (TI Acetaco OR AB Acetaco) OR (TI Tylenol OR AB Tylenol) OR (TI Anacin# OR AB Anacin#) OR (TI Datriil OR AB Datriil) OR (TI Panadol OR AB Panadol) OR (TI Acamol OR AB Acamol) OR (TI Algotropyl OR AB Algotropyl))                                                                                                                                                                                                                                                                                                                                                                                                                                                                                                                                                                                                                                                                                                                                                                                                                                                                                                                                                                                                                                                                                                                                                                                                   | 7,247  |
| S26 | ((TI NRI* OR AB NRI*) OR (TI Norepinephrine OR AB Norepinephrine) OR (TI SNRI* OR AB SNRI*))                                                                                                                                                                                                                                                                                                                                                                                                                                                                                                                                                                                                                                                                                                                                                                                                                                                                                                                                                                                                                                                                                                                                                                                                                                                                                                                                                                                                                                                                                                                                                                                                                                                                                                           | 5,865  |
| S25 | ((TI SSRI* OR AB SSRI*) OR (TI Serotonin* OR AB Serotonin*))                                                                                                                                                                                                                                                                                                                                                                                                                                                                                                                                                                                                                                                                                                                                                                                                                                                                                                                                                                                                                                                                                                                                                                                                                                                                                                                                                                                                                                                                                                                                                                                                                                                                                                                                           | 11,162 |
| S24 | ((TI Convalis OR AB Convalis) OR (TI dineurin OR AB dineurin) OR (TI gabalept OR AB gabalept) OR (TI gabaliquid OR AB gabaliquid) OR (TI geriasan OR AB geriasan) OR (TI Gabapen* OR AB Gabapen*) OR (TI gabatin OR AB gabatin) OR (TI gantin OR AB gantin) OR (TI gralise OR AB gralise) OR (TI kaptin OR AB kaptin) OR (TI keneil OR AB keneil) OR (TI Neurontin OR AB Neurontin) OR (TI neurotonin OR AB neurotonin) OR (TI nupentin OR AB nupentin) OR (TI sefelsa OR AB sefelsa) OR (TI serada OR AB serada))                                                                                                                                                                                                                                                                                                                                                                                                                                                                                                                                                                                                                                                                                                                                                                                                                                                                                                                                                                                                                                                                                                                                                                                                                                                                                     | 2,727  |
| S23 | ((TI apo-carbamazepine OR AB apo-carbamazepine) OR (TI Amizepin* OR AB Amizepin*) OR (TI atretol OR AB atretol) OR (TI Carbamazepine OR AB Carbamazepine) OR (TI Carbazepin OR AB Carbazepin) OR (TI Bipotrol OR AB Bipotrol) OR (TI biston OR AB biston) OR (TI calepsin OR AB calepsin) OR (TI camapine OR AB camapine) OR (TI carbadac OR AB carbadac) OR (TI carbadura OR AB carbadura) OR (TI carbagen OR AB carbagen) OR (TI carbalex OR AB carbalex) OR (TI carbategral OR AB carbategral) OR (TI carbatol OR AB carbatol) OR (TI carbatrol OR AB carbatrol) OR (TI carbazene OR AB carbazene) OR (TI carbazep OR AB carbazep) OR (TI carbazina OR AB carbazina) OR (TI carbella OR AB carbella) OR (TI carbepsil OR AB carbepsil) OR (TI carmaz OR AB carmaz) OR (TI carnexiv OR AB carnexiv) OR (TI carpaz OR AB carpaz) OR (TI carzepin OR AB carzepin) OR (TI carzepine OR AB carzepine) OR (TI clostedal OR AB clostedal) OR (TI convuline OR AB convuline) OR (TI curtail OR AB curtail) OR (TI epileptol OR AB epileptol) OR (TI epimax OR AB epimax) OR (TI epitol OR AB epitol) OR (TI "eposal retard" OR AB "eposal retard") OR (TI equetro OR AB equetro) OR (TI espa-lepsin OR AB espa-lepsin) OR (TI finlepsin OR AB finlepsin) OR (TI foxalepsin OR AB foxalepsin) OR (TI hermolepsin OR AB hermolepsin) OR (TI karbamazepin OR AB karbamazepin) OR (TI karbelex OR AB karbelex) OR (TI kodapan OR AB kodapan) OR (TI lexin OR AB lexin) OR (TI mazepine OR AB mazepine) OR (TI mazetol OR AB mazetol) OR (TI neugeron OR AB neugeron) OR (TI neurotol OR AB neurotol) OR (TI neurotop OR AB neurotop) OR (TI nordotol OR AB nordotol) OR (TI painbrake OR AB painbrake) OR (TI panitol OR AB panitol) OR (TI servimazepin OR AB servimazepin) OR (TI sirtal OR AB sirtal) OR (TI | 2,855  |

|     |                                                                                                                                                                                                                                                                                                                                                                                                                                                                                                                                                                                                                                      |        |
|-----|--------------------------------------------------------------------------------------------------------------------------------------------------------------------------------------------------------------------------------------------------------------------------------------------------------------------------------------------------------------------------------------------------------------------------------------------------------------------------------------------------------------------------------------------------------------------------------------------------------------------------------------|--------|
|     | stazepine OR AB stazepine) OR (TI storilat OR AB storilat) OR (TI syntopine OR AB syntopine) OR (TI tardotol OR AB tardotol) OR (TI taver OR AB taver) OR (TI tegol OR AB tegol) OR (TI tegral OR AB tegral) OR (TI tegretal OR AB tegretal) OR (TI tegretol OR AB tegretol) OR (TI Trileptal OR AB Trileptal) OR (TI Timox OR AB Timox) OR (TI temporol OR AB temporol) OR (TI teril OR AB teril) OR (TI timonil OR AB timonil) OR (TI tegrital OR AB tegrital) OR (TI telesmin OR AB telesmin))                                                                                                                                    |        |
| S22 | ((TI Pregabalin OR AB Pregabalin) OR (TI Lyrica OR AB Lyrica) OR (TI vronogabic OR AB vronogabic))                                                                                                                                                                                                                                                                                                                                                                                                                                                                                                                                   | 1,667  |
| S21 | ((TI "Local Anesthetic*" OR AB "Local Anesthetic*") OR (TI "Conduction-Blocking Anesthetic*" OR AB "Conduction-Blocking Anesthetic*") OR (TI "Topical Anesthetic*" OR AB "Topical Anesthetic*"))                                                                                                                                                                                                                                                                                                                                                                                                                                     | 4,489  |
| S20 | ((TI Granisetron OR AB Granisetron) OR (TI Hydrochloride OR AB Hydrochloride) OR (TI Kytril OR AB Kytril) OR (TI sustol OR AB sustol) OR (TI taraz OR AB taraz) OR (TI viatrinil OR AB viatrinil) OR (TI pandiol OR AB pandiol) OR (TI rasetron OR AB rasetron) OR (TI sancuso OR AB sancuso) OR (TI granisol OR AB granisol) OR (TI granissetrom OR AB granissetrom) OR (TI granitron OR AB granitron) OR (TI kevatril OR AB kevatril) OR (TI emegar OR AB emegar) OR (TI eutrom OR AB eutrom) OR (TI granegis OR AB granegis) OR (TI grani-denk OR AB grani-denk) OR (TI granicip OR AB granicip) OR (TI granigen OR AB granigen)) | 3,796  |
| S19 | ((TI Anodynes OR AB Anodynes) OR (TI Analgesic* OR AB Analgesic*) OR (TI Antinociceptive OR AB Antinociceptive) OR (TI opioid* OR AB opioid*) OR (TI opioid* OR AB opioid*))                                                                                                                                                                                                                                                                                                                                                                                                                                                         | 63,57  |
| S18 | ((TI "antiinflammatory" OR AB "antiinflammatory") OR (TI NSAID# OR AB NSAID#) OR (TI "Aspirin Like Agent#" OR AB "Aspirin Like Agent#") OR (TI "anti inflammatory" OR AB "anti inflammatory"))                                                                                                                                                                                                                                                                                                                                                                                                                                       | 37,604 |
| S17 | ((TI Glucocort* OR AB Glucocort*) OR (TI glycocort* OR AB glycocort*))                                                                                                                                                                                                                                                                                                                                                                                                                                                                                                                                                               | 8,071  |
| S16 | (MH Glucocorticoids+)                                                                                                                                                                                                                                                                                                                                                                                                                                                                                                                                                                                                                | 19,995 |
| S15 | (MH Analgesics+)                                                                                                                                                                                                                                                                                                                                                                                                                                                                                                                                                                                                                     | 63,406 |
| S14 | (MH "Anesthetics, local+")                                                                                                                                                                                                                                                                                                                                                                                                                                                                                                                                                                                                           | 19,588 |
| S13 | (MH "Neurotransmitter Uptake Inhibitors+")                                                                                                                                                                                                                                                                                                                                                                                                                                                                                                                                                                                           | 26,892 |
| S12 | (MH " Botulinum Toxins")                                                                                                                                                                                                                                                                                                                                                                                                                                                                                                                                                                                                             | 6,068  |
| S11 | (MH "Serotonin Agents+")                                                                                                                                                                                                                                                                                                                                                                                                                                                                                                                                                                                                             | 18,137 |
| S10 | (MH Anticonvulsants+)                                                                                                                                                                                                                                                                                                                                                                                                                                                                                                                                                                                                                | 21,322 |
| S9  | (MH "Antidepressive Agents+")                                                                                                                                                                                                                                                                                                                                                                                                                                                                                                                                                                                                        | 25,743 |
| S8  | (MH "AntiInflammatory Agents+")                                                                                                                                                                                                                                                                                                                                                                                                                                                                                                                                                                                                      | 77,054 |
| S7  | S1 OR S2 OR S3 OR S4 OR S5 OR S6                                                                                                                                                                                                                                                                                                                                                                                                                                                                                                                                                                                                     | 11,515 |
| S6  | ((TI "costen* syndrom*" OR AB "costen* syndrom*") OR (TI tmd* OR AB tmd*))                                                                                                                                                                                                                                                                                                                                                                                                                                                                                                                                                           | 2,741  |
| S5  | ((TI myofascial OR AB myofascial) OR (TI orofacial OR AB orofacial)) N1 ((TI pain* OR AB pain*) OR (TI syndrom* OR AB syndrom*) OR (TI "trigger point*" OR AB "trigger point*"))                                                                                                                                                                                                                                                                                                                                                                                                                                                     | 3,477  |
| S4  | ((TI jaw OR AB jaw) OR (TI temporomandibular OR AB temporomandibular) OR (TI tmj OR AB tmj)) N2 ((TI arthropath* OR AB arthropath*) OR (TI disease* OR AB disease*) OR (TI dislocation* OR AB dislocation*) OR (TI disorder* OR AB disorder*) OR (TI dysfuncti* OR AB dysfuncti*) OR (TI luxation* OR AB luxation*) OR (TI pain* OR AB pain*) OR (TI subluxation* OR AB subluxation*) OR (TI syndrom* OR AB syndrom*))                                                                                                                                                                                                               | 4,812  |
| S3  | ((TI Craniomandibular OR AB Craniomandibular) N2 ((TI arthropath* OR AB arthropath*) OR (TI disease* OR AB disease*) OR (TI disorder* OR AB disorder*) OR (TI dysfuncti* OR AB dysfuncti*) OR (TI pain* OR AB pain*) OR (TI syndrom* OR AB syndrom*))                                                                                                                                                                                                                                                                                                                                                                                | 83     |
| S2  | (MH "Myofascial Pain Syndromes+")                                                                                                                                                                                                                                                                                                                                                                                                                                                                                                                                                                                                    | 3,56   |
| S1  | (MH "Craniomandibular Disorders+")                                                                                                                                                                                                                                                                                                                                                                                                                                                                                                                                                                                                   | 5,767  |
